# Supplementary material
Source: PubMed Central journal article supplement (PMC3263948)
Supplement: supp_mol.111.075184_Supp_Figure_1_75184.pdf [file supp_mol.111.075184_Supp_Figure_1_75184.pdf]

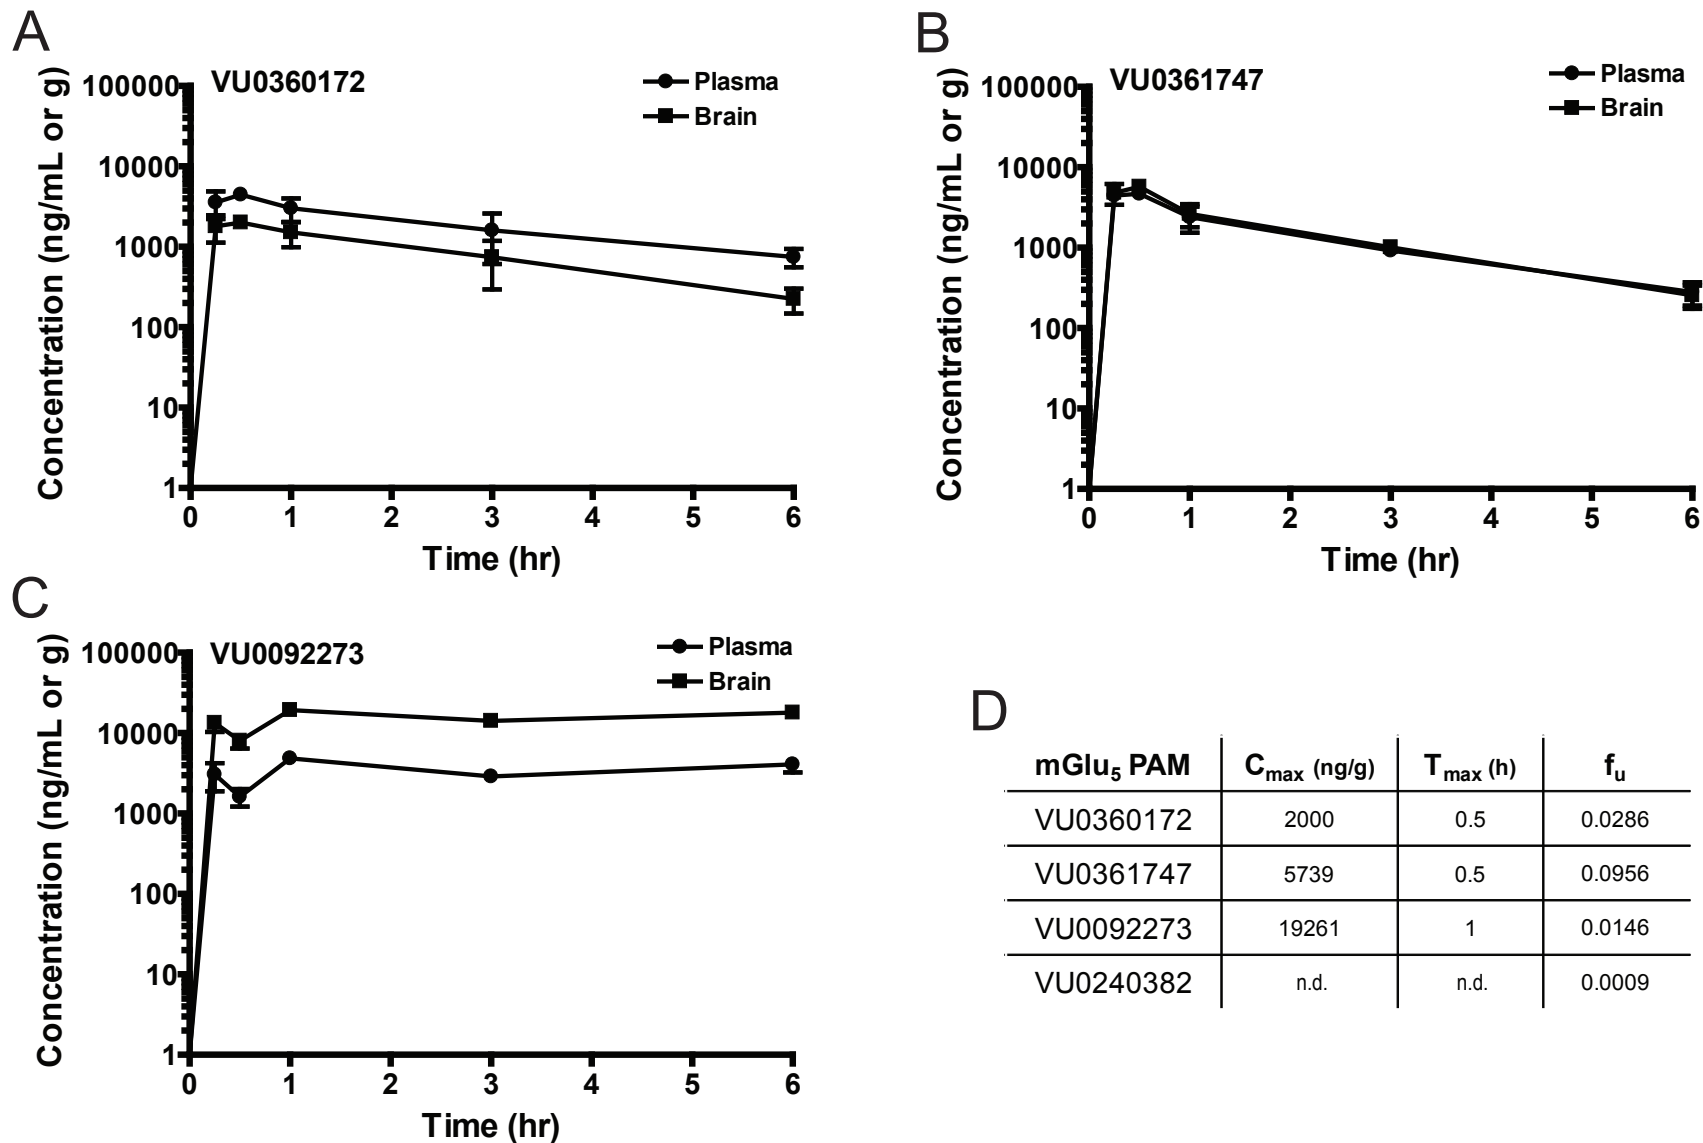

Supplemental Figure 1. Time-concentration profiles of mGlu<sub>5</sub> PAMs demonstrate rapid absorption into the systemic circulation and brain. Male Sprague-Dawley rats received an i.p. dose of A) VU0360172, B) VU0361747 or C) VU0092273 at 10 mg/kg in 10% Tween 80. Concentrations of test compound were measured in systemic blood and whole-brain tissues 0.25, 0.5, 1, 3 and 6 hours following dosing. Data are expressed as mean  $\pm$  S.E.M of the plasma (ng/ml) or brain (ng/g) concentration (n = 2-3). D) Summary of maximum brain concentration (C<sub>max</sub>) and time (T<sub>max</sub>), in addition to free fraction (f<sub>u</sub>) of test compounds as determined by brain homogenate binding. n.d. values not determined.
