# Supplementary material
Source: PubMed Central journal article supplement (PMC3263948)
Supplement: supp_mol.111.075184_Supp_Figure_2_75184.pdf [file supp_mol.111.075184_Supp_Figure_2_75184.pdf]

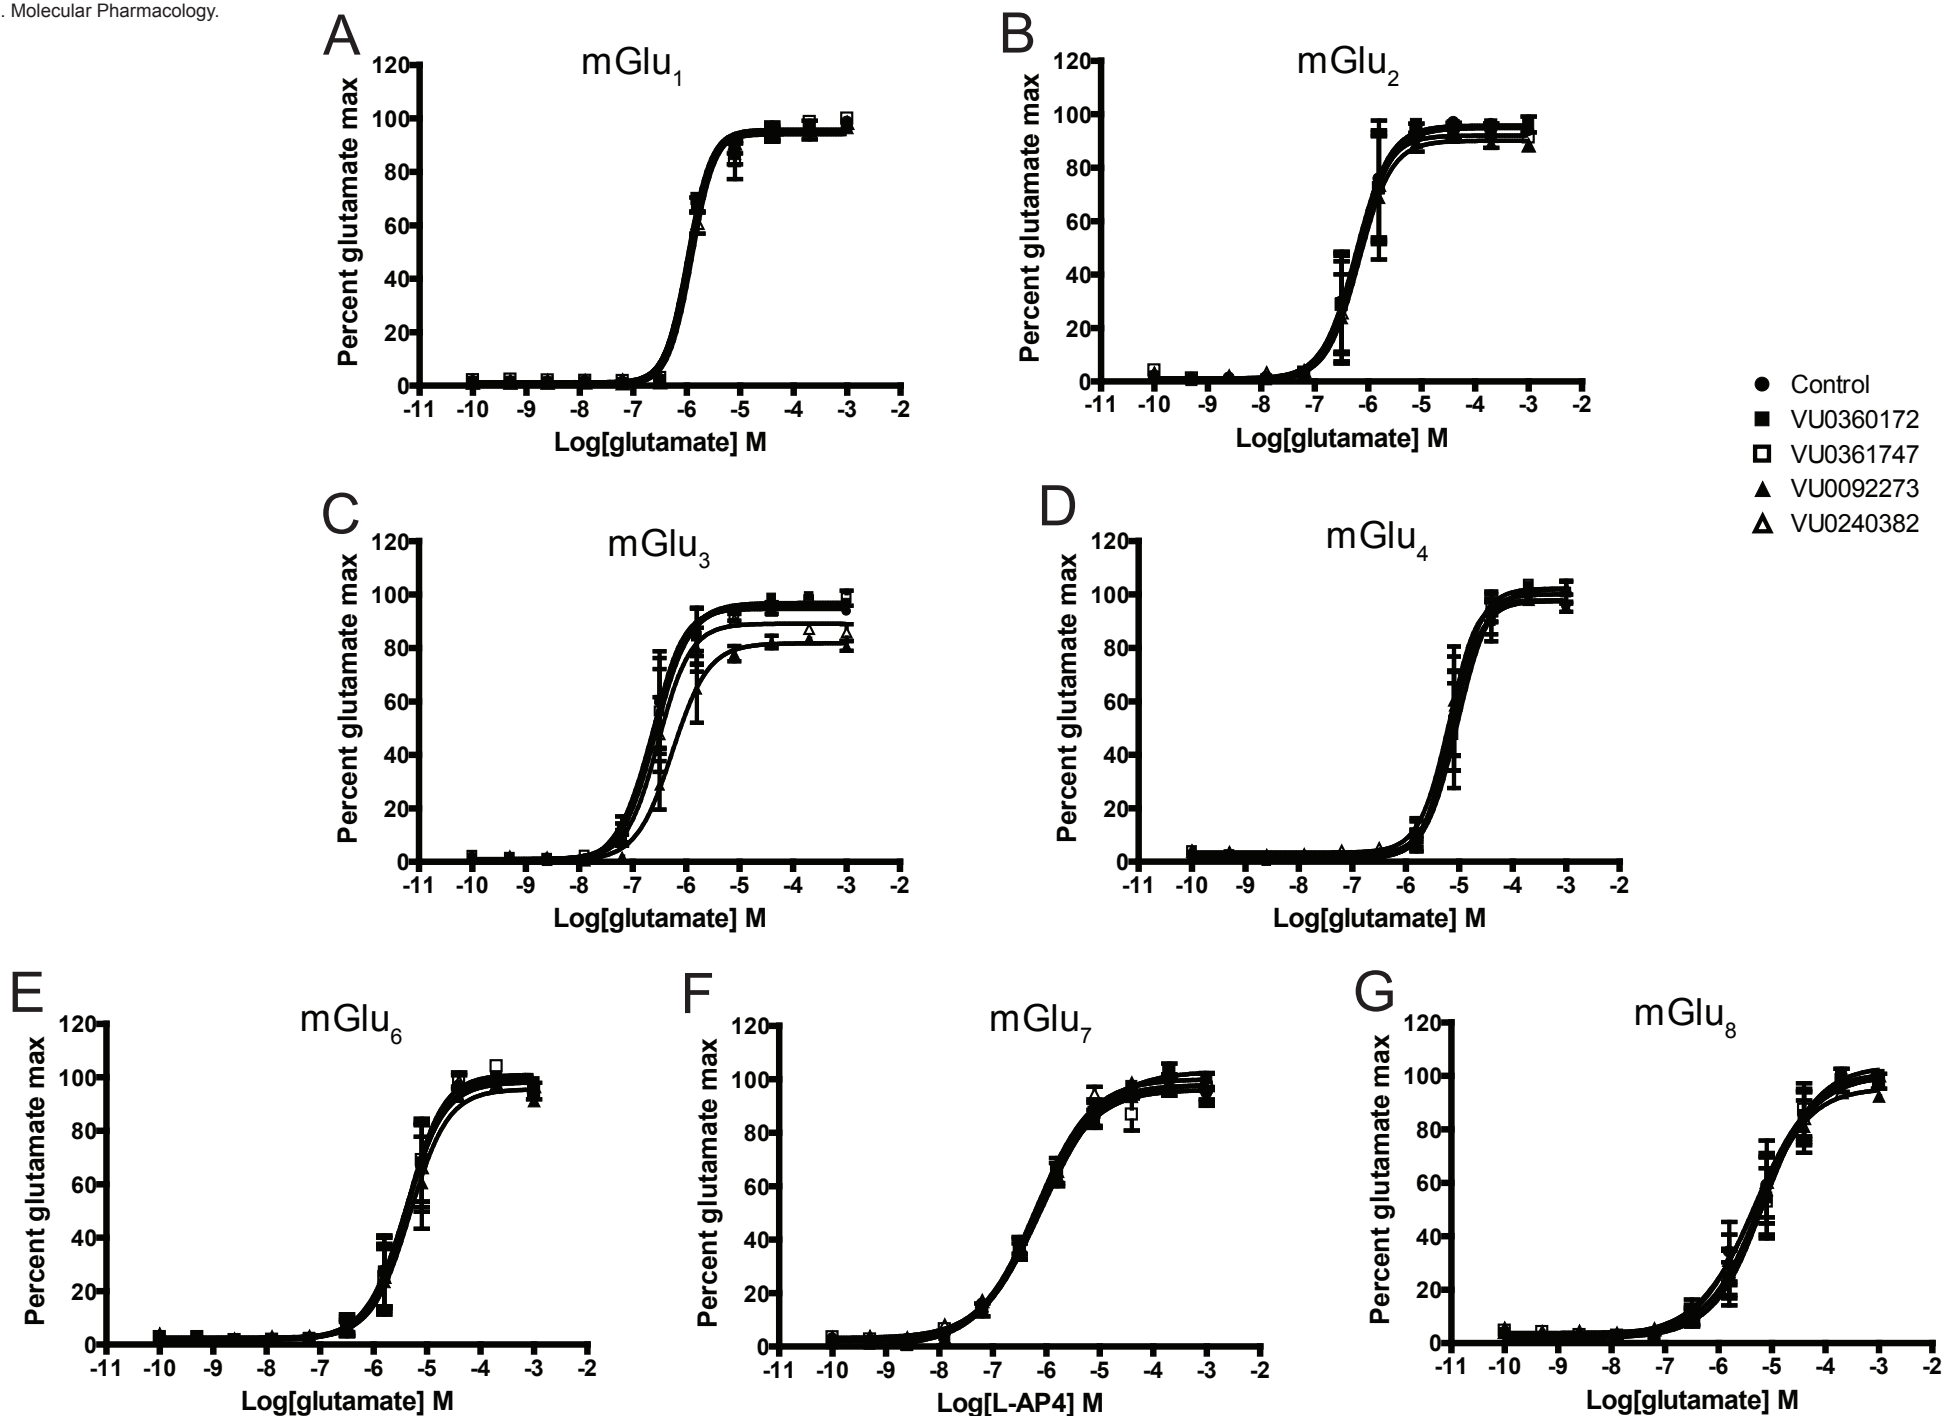

Supplemental Figure 2. mGlu5 allosteric modulators are selective for mGlu5 over other mGlu receptor subtypes. A 10  $\mu$ M concentration of allosteric modulator was added to the cells prior to the addition of a concentration-response curve to glutamate, or L-AP4 in the case of mGlu7. No shift in the glutamate concentration-response curve was observed in the presence of 10  $\mu$ M mGlu5 allosteric modulator for A) mGlu1, B) mGlu2, C) mGlu3, D) mGlu4, E) mGlu6, F) mGlu7 or G) mGlu8, except 10  $\mu$ M VU0092273, which had minimal antagonist activity at mGlu3 (C). Data represent the mean  $\pm$  SEM of three independent experiments performed in duplicate.
