# Supplementary material
Source: PubMed Central journal article supplement (PMC3263948)
Supplement: supp_mol.111.075184_Supp_Figure_4_75184.pdf [file supp_mol.111.075184_Supp_Figure_4_75184.pdf]

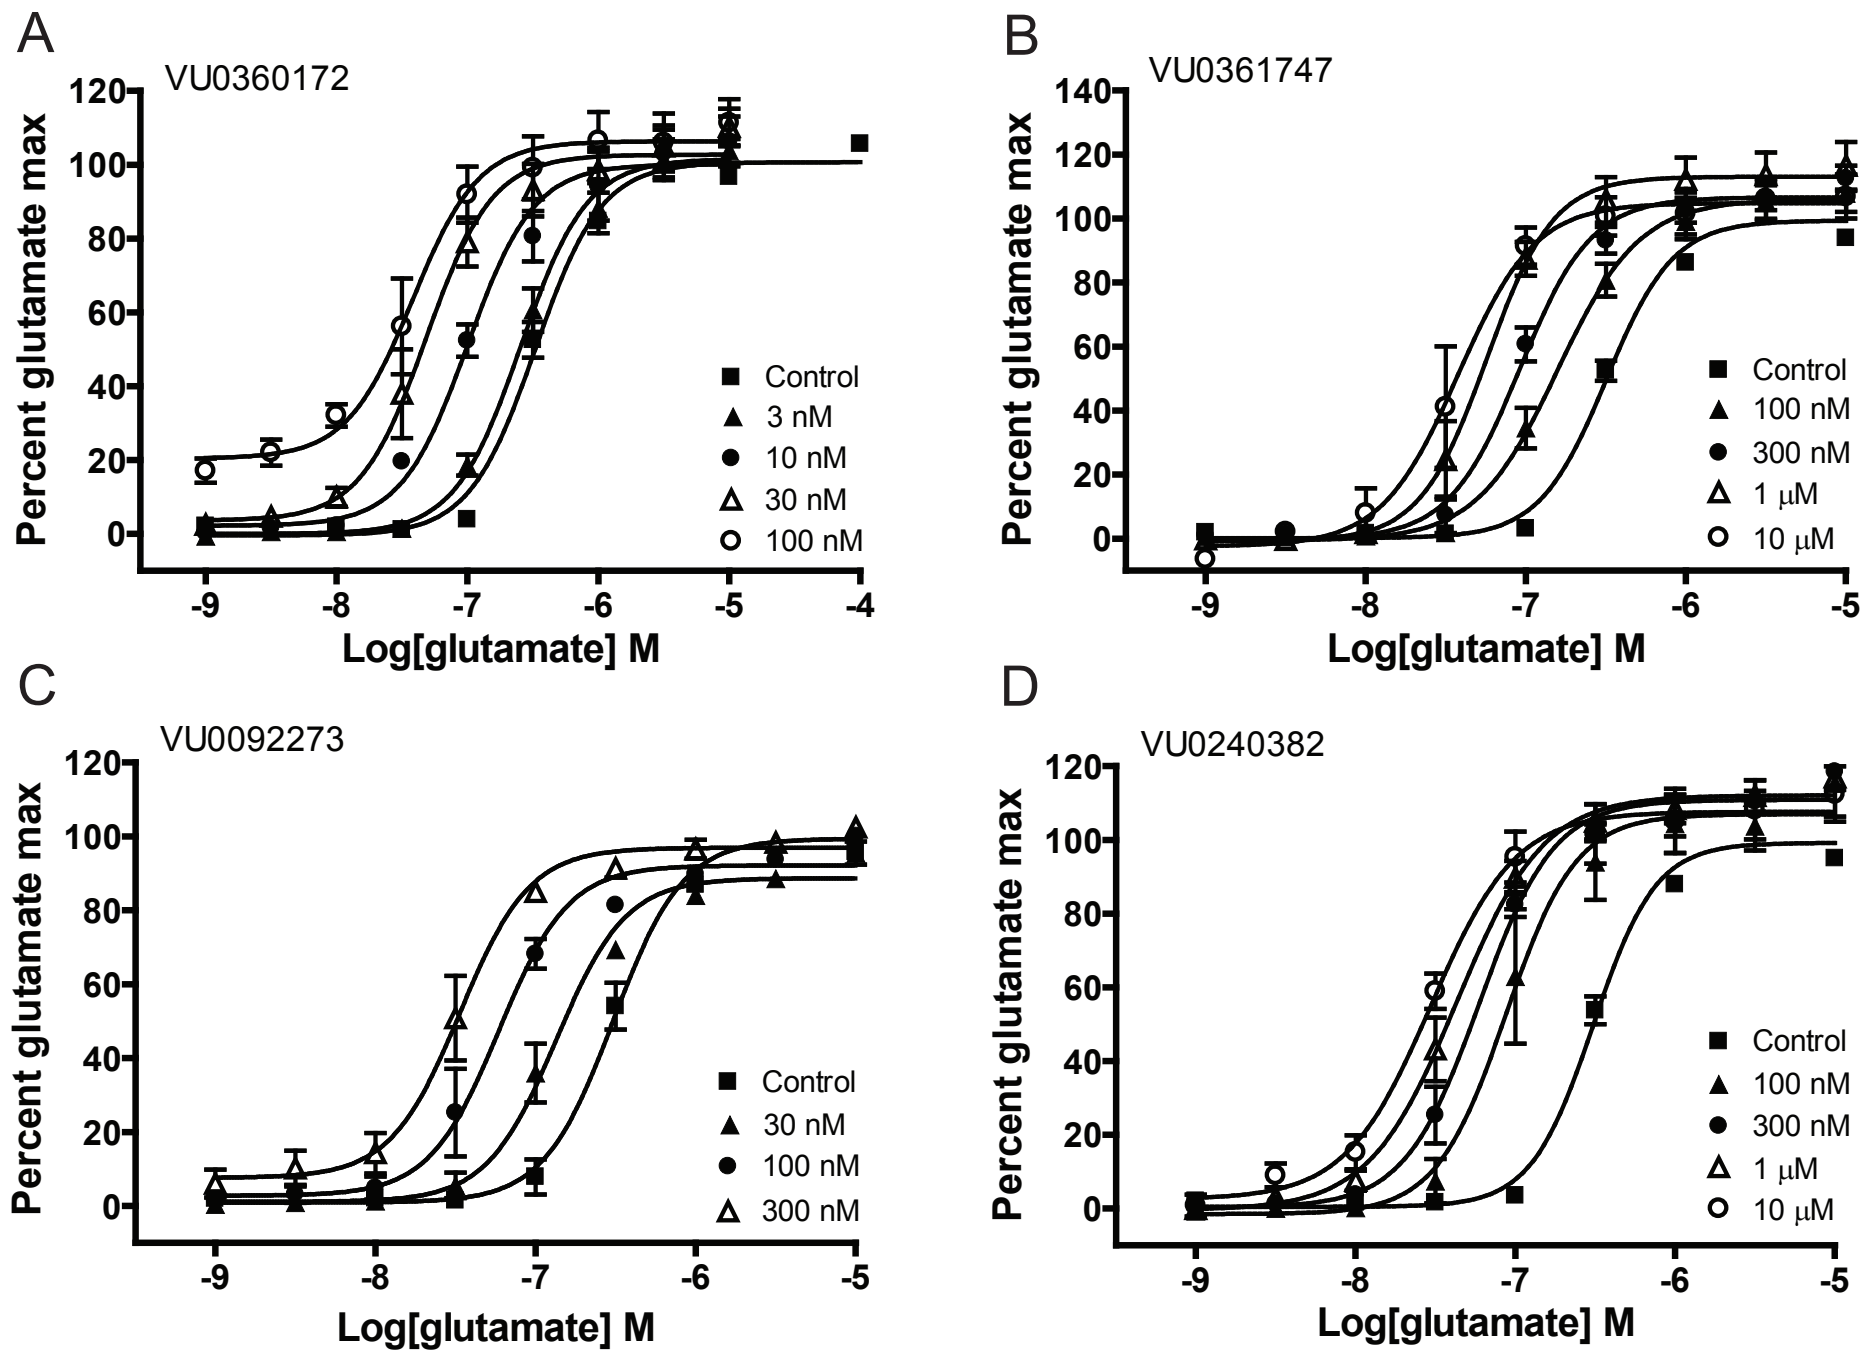

Supplemental Figure 4. Similar to the results observed in the low mGlu5 expressing cell line, mGlu5 allosteric modulators induce a leftward shift in the concentration-response curve to glutamate in the high expression mGlu5 cell line. Progressive fold shift values were determined by treating cells with increasing fixed concentrations of PAMs followed by the addition of a CRC to glutamate. The calcium response was measured and normalized to a maximally effective concentration of glutamate (10 μM). A) VU0360172, B) VU0361747, C) VU0092273, and D) VU0240382. Data represents the mean ± SEM of 3-5 independent experiments performed in duplicate.
