# Supplementary material
Source: PubMed Central journal article supplement (PMC3263948)
Supplement: supp_mol.111.075184_Supp_Figure_5_75184.pdf [file supp_mol.111.075184_Supp_Figure_5_75184.pdf]

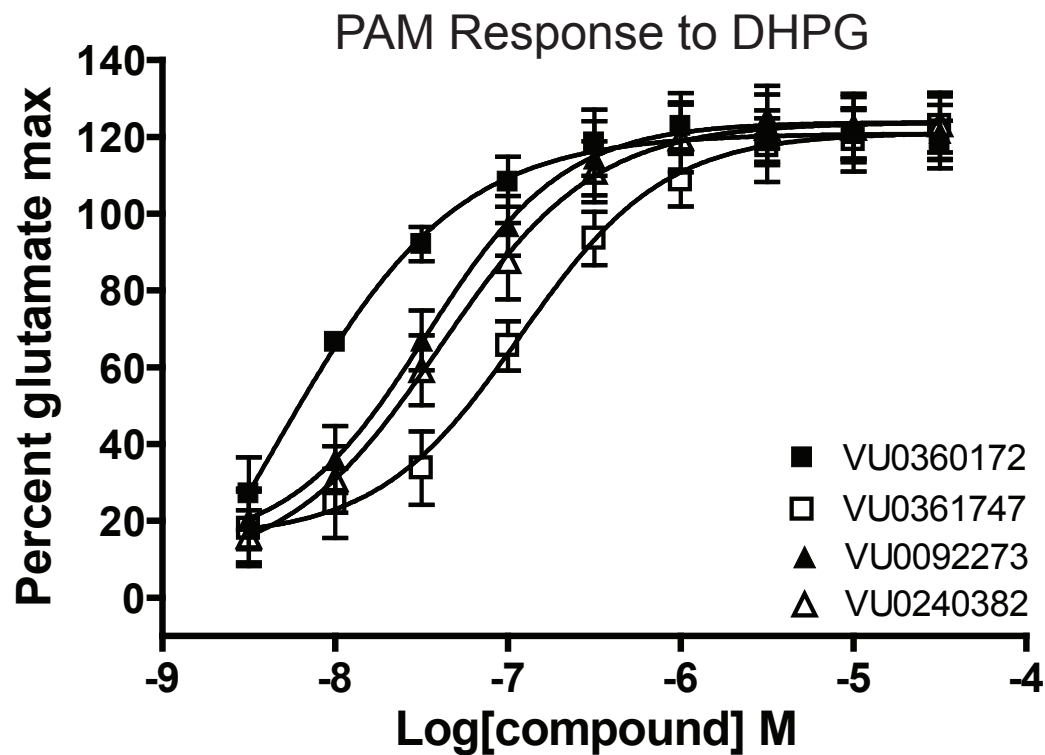

Supplemental Figure 5. mGlu5 allosteric modulators do not exhibit probe-dependence for the orthosteric agonist DHPG. Cells with high expression of mGlu5 were treated with increasing concentrations of mGlu5 compounds followed by an EC<sub>20</sub> concentration of DHPG. The calcium response was measured and normalized to a maximally effective concentration of glutamate (100  $\mu$ M). In all cases, the mGlu5 compounds enhanced the response to a suboptimal (EC<sub>20</sub>) concentration of DHPG in a concentration-dependent manner, similar to that observed with glutamate. Data represent the mean  $\pm$  SEM of four independent experiments performed in duplicate.
