# Supplementary material
Source: PubMed Central journal article supplement (PMC3263948)
Supplement: supp_mol.111.075184_Supp_Figure_6_75184.pdf [file supp_mol.111.075184_Supp_Figure_6_75184.pdf]

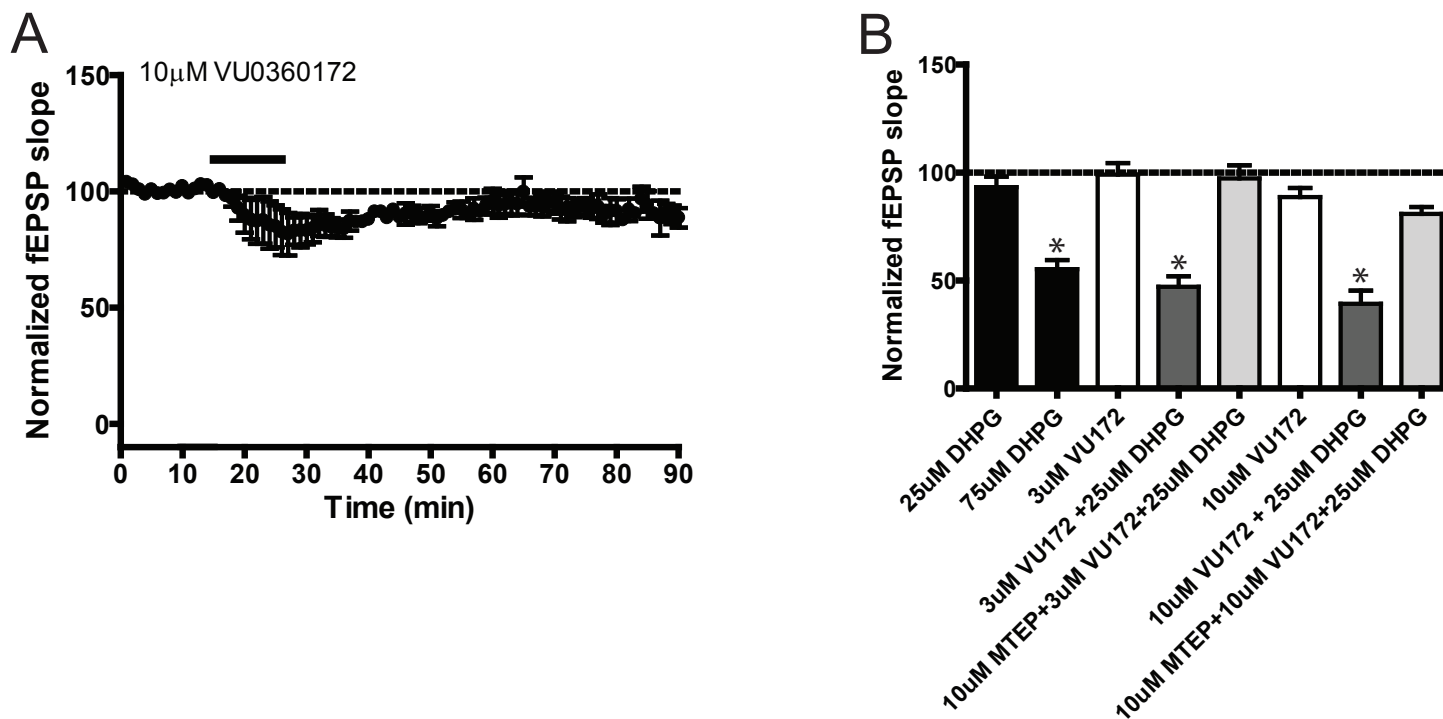

Supplemental Figure 6. Potentiation of DHPG-induced long-term depression at the SC-CA1 synapse by mGlu5 allosteric modulators is blocked by the mGlu5 antagonist MTEP. A) Application of 10  $\mu$ M VU0360172 for 10 minutes (solid line) did not induce LTD measured 55 minutes after compound wash out, however, an acute depression in fEPSP slope was observed in 2 of the 7 slices tested (n=7). B) fEPSPs slopes were determined 55 minutes after washout of compound(s) and normalized to the average of the predrug slope for each of the conditions noted. Data represent the mean  $\pm$  SEM for 6-7 independent experiments for each treatment group. Statistical analysis was performed using an ANOVA with Dunnett's post test, \* denotes significant difference ( $p < 0.01$ ) from 25  $\mu$ M DHPG.
