# Supplementary material
Source: PubMed Central journal article supplement (PMC3263948)
Supplement: supp_mol.111.075184_Supp_Figure_7_75184.pdf [file supp_mol.111.075184_Supp_Figure_7_75184.pdf]

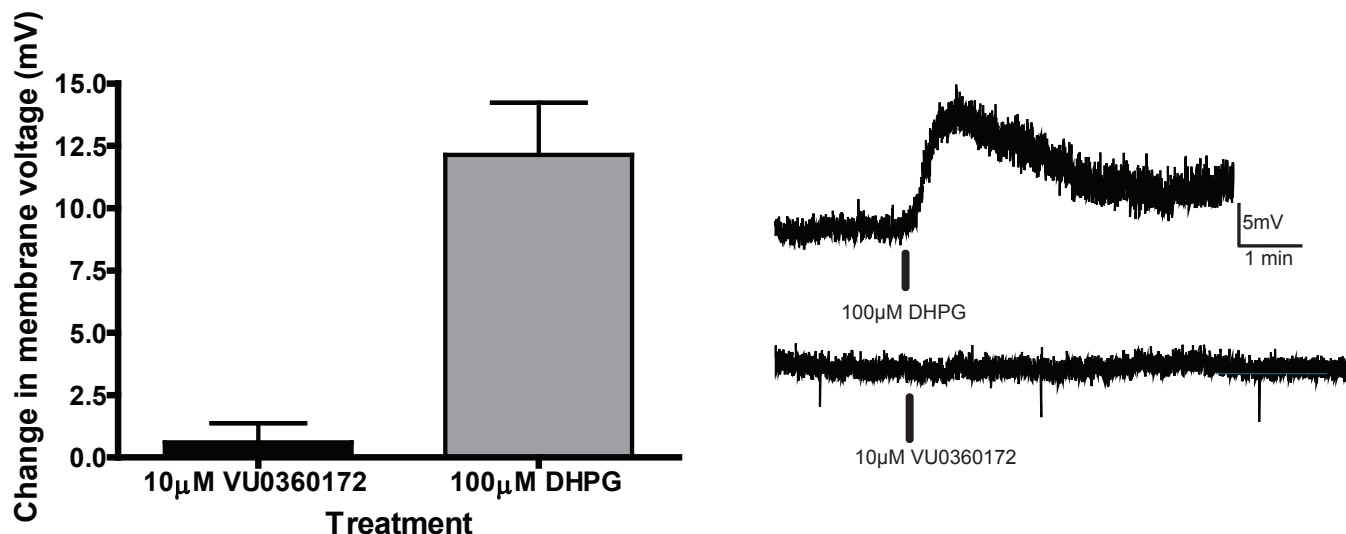

Supplemental Figure 7. VU0360172 does not induce a change in membrane potential in subthalamic nucleus neurons. Depolarization of STN neurons was measured using whole-cell patch-clamp recordings with neurons current clamped at -60mV in the presence of 0.5 μm tetrodotoxin. Sample traces from an individual experiment from each treatment condition are shown. Application of 10 μM VU0360172 had no effect on membrane depolarization (n=5) whereas 100 μM DHPG induced a robust depolarization (n=6). Error bars represent the SEM.
